# Supplementary material for: Molecular Epidemiology of Human Rhinovirus in Children with Acute Respiratory Diseases in Chongqing, China
Source: PubMed Central journal article supplement — Sci Rep. 2014 Oct 20;4:6686. doi: 10.1038/srep06686 (PMC4202208; doi:10.1038/srep06686), 2014-10-20
Supplement: srep06686-s1.pdf [file srep06686-s1.pdf]

**Molecular Epidemiology of Human Rhinovirus in Children with Acute Respiratory Diseases in Chongqing, China**

Qing-Bin Lu, MD<sup>1#</sup>, Ying Wo, MM<sup>2#</sup>, Li-Yuan, Wang, MM<sup>2,3</sup>, Hong-Yu Wang, MM<sup>2,3</sup>, Dou-Dou Huang, MM<sup>2,3</sup>, Xiao-Ai Zhang, PhD<sup>2</sup>, Wei Liu, MD<sup>2\*</sup>, Wu-Chun Cao, MD, PhD<sup>2\*</sup>

1. School of Public Health, Peking University, Beijing, 100191, P. R. China

2. State Key Laboratory of Pathogen and Biosecurity, Beijing Institute of Microbiology and Epidemiology, Beijing, 100071, P. R. China

3. Graduate School of Anhui Medical University, Hefei, 230032, P. R. China

# These authors contributed equally to this work.

**Corresponding Author:**

Wu-Chun Cao M.D., Ph.D., State Key Laboratory of Pathogen and Biosecurity, Beijing Institute of Microbiology and Epidemiology, 20 Dong-Da Street, Fengtai District, Beijing 100071, P. R. China., Tel (+86)10-63896082, Fax (+86)10-63896082, E-mail: [caowc@bmi.ac.cn](mailto:caowc@bmi.ac.cn)

Wei Liu M.D., State Key Laboratory of Pathogen and Biosecurity, Beijing Institute of Microbiology and Epidemiology, 20 Dong-Da Street, Fengtai District, Beijing 100071, P. R. China., Tel (+86)10-63896082, Fax (+86)10-63896082, E-mail: [lwbime@163.com](mailto:lwbime@163.com)

Supplemental Table 1 Sequence identity matrix between the sequences from our study and from GenBank

| Seq->             | CQ1389       | CQ1469       | CQ1473       | CQ2026       | CQ2029       | CQ3072       | CQ3089       | CQ3144       | CQ3160       | CQ3166       | CQ3181       | CQ3276       |
|-------------------|--------------|--------------|--------------|--------------|--------------|--------------|--------------|--------------|--------------|--------------|--------------|--------------|
| <b>MaxValue</b>   | <b>0.931</b> | <b>0.926</b> | <b>0.934</b> | <b>0.898</b> | <b>0.977</b> | <b>0.979</b> | <b>0.951</b> | <b>0.835</b> | <b>0.959</b> | <b>0.967</b> | <b>0.946</b> | <b>0.994</b> |
| HRV-C1(EF077279)  | 0.751        | 0.802        | 0.681        | 0.741        | 0.787        | 0.736        | 0.756        | 0.691        | 0.764        | 0.837        | 0.739        | 0.726        |
| HRV-C2(EF077280)  | 0.762        | 0.746        | 0.724        | 0.744        | 0.744        | 0.729        | 0.772        | 0.82         | 0.772        | 0.744        | 0.855        | 0.807        |
| HRV-C3(EF186077)  | 0.764        | 0.774        | 0.691        | 0.741        | 0.764        | 0.746        | 0.759        | 0.706        | 0.762        | 0.886        | 0.751        | 0.746        |
| HRV-C4(EF582385)  | 0.749        | 0.729        | 0.724        | 0.759        | 0.759        | 0.751        | 0.731        | 0.756        | 0.726        | 0.726        | 0.767        | 0.769        |
| HRV-C5(EF582386)  | 0.731        | 0.683        | 0.865        | 0.703        | 0.681        | 0.729        | 0.716        | 0.749        | 0.724        | 0.678        | 0.734        | 0.724        |
| HRV-C6(EF582387)  | 0.716        | 0.779        | 0.701        | 0.734        | 0.782        | 0.746        | 0.751        | 0.718        | 0.754        | 0.967        | 0.762        | 0.729        |
| HRV-C7(DQ875932)  | 0.734        | 0.794        | 0.708        | 0.744        | 0.792        | 0.724        | 0.716        | 0.721        | 0.726        | 0.779        | 0.739        | 0.729        |
| HRV-C8(GQ223227)  | 0.749        | 0.716        | 0.703        | 0.789        | 0.726        | 0.749        | 0.802        | 0.741        | 0.81         | 0.739        | 0.734        | 0.767        |
| HRV-C9(GQ223228)  | 0.718        | 0.721        | 0.736        | 0.726        | 0.741        | 0.979        | 0.769        | 0.744        | 0.782        | 0.746        | 0.756        | 0.716        |
| HRV-C10(GQ323774) | 0.736        | 0.802        | 0.686        | 0.736        | 0.762        | 0.731        | 0.749        | 0.706        | 0.749        | 0.837        | 0.749        | 0.754        |
| HRV-C11(EU840952) | 0.701        | 0.686        | 0.934        | 0.691        | 0.711        | 0.726        | 0.718        | 0.708        | 0.721        | 0.693        | 0.711        | 0.716        |
| HRV-C12(EF077264) | 0.769        | 0.718        | 0.718        | 0.777        | 0.756        | 0.754        | 0.835        | 0.729        | 0.845        | 0.734        | 0.706        | 0.736        |
| HRV-C13(EU081795) | 0.708        | 0.784        | 0.693        | 0.749        | 0.779        | 0.724        | 0.711        | 0.731        | 0.716        | 0.789        | 0.741        | 0.721        |
| HRV-C14(EU081796) | 0.769        | 0.721        | 0.751        | 0.759        | 0.731        | 0.754        | 0.769        | 0.787        | 0.779        | 0.721        | 0.784        | 0.782        |
| HRV-C15(GU219984) | 0.81         | 0.698        | 0.703        | 0.762        | 0.731        | 0.746        | 0.729        | 0.762        | 0.741        | 0.731        | 0.764        | 0.754        |
| HRV-C16(EU081808) | 0.764        | 0.731        | 0.691        | 0.898        | 0.764        | 0.734        | 0.789        | 0.749        | 0.787        | 0.741        | 0.729        | 0.741        |
| HRV-C17(EU081809) | 0.769        | 0.701        | 0.711        | 0.875        | 0.759        | 0.736        | 0.792        | 0.736        | 0.792        | 0.759        | 0.731        | 0.739        |
| HRV-C18(EU590074) | 0.731        | 0.759        | 0.673        | 0.789        | 0.734        | 0.762        | 0.764        | 0.744        | 0.782        | 0.734        | 0.731        | 0.762        |
| HRV-C19(EU697850) | 0.736        | 0.736        | 0.688        | 0.746        | 0.724        | 0.746        | 0.734        | 0.754        | 0.744        | 0.716        | 0.746        | 0.769        |
| HRV-C20(EU697851) | 0.711        | 0.696        | 0.805        | 0.703        | 0.686        | 0.744        | 0.708        | 0.726        | 0.716        | 0.713        | 0.731        | 0.724        |
| HRV-C21(EU752377) | 0.721        | 0.817        | 0.706        | 0.721        | 0.8          | 0.751        | 0.713        | 0.718        | 0.718        | 0.787        | 0.734        | 0.749        |
| HRV-C22(EU752381) | 0.718        | 0.792        | 0.711        | 0.729        | 0.759        | 0.756        | 0.751        | 0.713        | 0.754        | 0.81         | 0.749        | 0.741        |
| HRV-C23(EU752424) | 0.931        | 0.703        | 0.703        | 0.751        | 0.741        | 0.729        | 0.744        | 0.751        | 0.744        | 0.724        | 0.749        | 0.769        |
| HRV-C24(EU752426) | 0.756        | 0.703        | 0.741        | 0.787        | 0.762        | 0.731        | 0.759        | 0.777        | 0.774        | 0.736        | 0.774        | 0.802        |
| HRV-C25(JF317013) | 0.784        | 0.721        | 0.706        | 0.751        | 0.724        | 0.721        | 0.772        | 0.772        | 0.769        | 0.744        | 0.754        | 0.994        |

Supplemental Table 1 Sequence identity matrix between the sequences from our study and from GenBank (continue)

| Seq->             | CQ1389 | CQ1469 | CQ1473 | CQ2026 | CQ2029 | CQ3072 | CQ3089 | CQ3144 | CQ3160 | CQ3166 | CQ3181 | CQ3276 |
|-------------------|--------|--------|--------|--------|--------|--------|--------|--------|--------|--------|--------|--------|
| HRV-C26(EU752441) | 0.716  | 0.711  | 0.708  | 0.706  | 0.739  | 0.749  | 0.741  | 0.736  | 0.759  | 0.734  | 0.731  | 0.741  |
| HRV-C27(GQ223122) | 0.718  | 0.711  | 0.848  | 0.686  | 0.708  | 0.713  | 0.686  | 0.741  | 0.678  | 0.703  | 0.756  | 0.708  |
| HRV-C28(GQ223134) | 0.759  | 0.769  | 0.708  | 0.794  | 0.739  | 0.767  | 0.779  | 0.731  | 0.794  | 0.741  | 0.746  | 0.762  |
| HRV-C29(FJ615699) | 0.713  | 0.683  | 0.802  | 0.683  | 0.675  | 0.734  | 0.698  | 0.729  | 0.708  | 0.688  | 0.731  | 0.718  |
| HRV-C30(GQ476669) | 0.8    | 0.741  | 0.696  | 0.749  | 0.754  | 0.731  | 0.746  | 0.754  | 0.756  | 0.751  | 0.767  | 0.774  |
| HRV-C31(GU294380) | 0.759  | 0.726  | 0.691  | 0.774  | 0.731  | 0.754  | 0.769  | 0.729  | 0.779  | 0.754  | 0.734  | 0.746  |
| HRV-C32(GU294466) | 0.721  | 0.805  | 0.713  | 0.767  | 0.977  | 0.749  | 0.749  | 0.724  | 0.754  | 0.769  | 0.769  | 0.724  |
| HRV-C33(GU294480) | 0.736  | 0.691  | 0.696  | 0.706  | 0.698  | 0.718  | 0.718  | 0.756  | 0.721  | 0.698  | 0.739  | 0.734  |
| HRV-C34(JF519759) | 0.708  | 0.681  | 0.802  | 0.693  | 0.681  | 0.751  | 0.726  | 0.718  | 0.724  | 0.721  | 0.708  | 0.739  |
| HRV-C35(JF436925) | 0.744  | 0.726  | 0.734  | 0.756  | 0.726  | 0.746  | 0.744  | 0.835  | 0.751  | 0.708  | 0.782  | 0.751  |
| HRV-C36(EF077256) | 0.729  | 0.736  | 0.713  | 0.706  | 0.724  | 0.772  | 0.739  | 0.736  | 0.739  | 0.746  | 0.779  | 0.739  |
| HRV-C37(EF077260) | 0.713  | 0.744  | 0.703  | 0.729  | 0.741  | 0.764  | 0.731  | 0.774  | 0.734  | 0.749  | 0.749  | 0.749  |
| HRV-C38(GU294477) | 0.718  | 0.686  | 0.878  | 0.693  | 0.716  | 0.721  | 0.726  | 0.739  | 0.718  | 0.693  | 0.726  | 0.716  |
| HRV-C39(JN205461) | 0.731  | 0.777  | 0.718  | 0.746  | 0.901  | 0.749  | 0.749  | 0.724  | 0.749  | 0.784  | 0.756  | 0.754  |
| HRV-C40(EU081802) | 0.741  | 0.746  | 0.731  | 0.754  | 0.756  | 0.751  | 0.782  | 0.784  | 0.782  | 0.762  | 0.946  | 0.779  |
| HRV-C41(EU081803) | 0.789  | 0.734  | 0.696  | 0.784  | 0.759  | 0.726  | 0.769  | 0.744  | 0.777  | 0.731  | 0.767  | 0.782  |
| HRV-C42(EU081805) | 0.779  | 0.721  | 0.698  | 0.779  | 0.767  | 0.777  | 0.825  | 0.749  | 0.822  | 0.777  | 0.756  | 0.734  |
| HRV-C43(EU081807) | 0.713  | 0.926  | 0.686  | 0.713  | 0.789  | 0.736  | 0.736  | 0.713  | 0.744  | 0.784  | 0.756  | 0.726  |
| HRV-C44(EU590061) | 0.751  | 0.716  | 0.736  | 0.792  | 0.754  | 0.8    | 0.951  | 0.751  | 0.959  | 0.774  | 0.774  | 0.772  |
| HRV-C45(EU590064) | 0.703  | 0.693  | 0.81   | 0.668  | 0.675  | 0.729  | 0.698  | 0.731  | 0.701  | 0.696  | 0.744  | 0.731  |
| HRV-C46(FJ869950) | 0.756  | 0.706  | 0.724  | 0.736  | 0.744  | 0.777  | 0.772  | 0.751  | 0.769  | 0.739  | 0.772  | 0.744  |
| HRV-C47(JF519761) | 0.749  | 0.718  | 0.731  | 0.769  | 0.726  | 0.731  | 0.772  | 0.789  | 0.769  | 0.729  | 0.825  | 0.8    |
| HRV-C48(JF519763) | 0.746  | 0.731  | 0.721  | 0.729  | 0.734  | 0.769  | 0.762  | 0.787  | 0.769  | 0.726  | 0.8    | 0.769  |
| HRV-C49(JF946737) | 0.751  | 0.736  | 0.739  | 0.746  | 0.751  | 0.749  | 0.759  | 0.756  | 0.749  | 0.746  | 0.789  | 0.792  |
| HRV-C50(FJ841957) | 0.769  | 0.721  | 0.736  | 0.762  | 0.739  | 0.759  | 0.769  | 0.779  | 0.767  | 0.746  | 0.762  | 0.774  |
| HRV-C51(JF317015) | 0.729  | 0.746  | 0.716  | 0.703  | 0.726  | 0.764  | 0.744  | 0.772  | 0.739  | 0.724  | 0.751  | 0.762  |

Supplemental Table 1 Sequence identity matrix between the sequences from our study and from GenBank (continue)

| Seq->                    | CQ3622       | CQ3643       | CQ4193       | CQ4197       | CQ4207       | CQ4216       | CQ4226       | CQ4234       | CQ4244       | CQ4245       | CQ4257       | CQ4260       |
|--------------------------|--------------|--------------|--------------|--------------|--------------|--------------|--------------|--------------|--------------|--------------|--------------|--------------|
| <b>MaxValue</b>          | <b>0.939</b> | <b>0.936</b> | <b>0.934</b> | <b>0.906</b> | <b>0.926</b> | <b>0.944</b> | <b>0.939</b> | <b>0.939</b> | <b>0.944</b> | <b>0.835</b> | <b>0.906</b> | <b>0.845</b> |
| <b>HRV-C1(EF077279)</b>  | 0.794        | 0.772        | 0.774        | 0.703        | 0.734        | 0.739        | 0.858        | 0.858        | 0.739        | 0.693        | 0.708        | 0.756        |
| <b>HRV-C2(EF077280)</b>  | 0.739        | 0.749        | 0.751        | 0.746        | 0.779        | 0.855        | 0.734        | 0.734        | 0.855        | 0.807        | 0.746        | 0.708        |
| <b>HRV-C3(EF186077)</b>  | 0.769        | 0.746        | 0.749        | 0.688        | 0.736        | 0.751        | 0.893        | 0.893        | 0.751        | 0.701        | 0.691        | 0.718        |
| <b>HRV-C4(EF582385)</b>  | 0.739        | 0.741        | 0.739        | 0.721        | 0.756        | 0.767        | 0.729        | 0.729        | 0.767        | 0.762        | 0.724        | 0.686        |
| <b>HRV-C5(EF582386)</b>  | 0.693        | 0.688        | 0.686        | 0.843        | 0.754        | 0.731        | 0.681        | 0.681        | 0.731        | 0.741        | 0.843        | 0.658        |
| <b>HRV-C6(EF582387)</b>  | 0.779        | 0.726        | 0.724        | 0.708        | 0.724        | 0.754        | 0.939        | 0.939        | 0.754        | 0.721        | 0.706        | 0.736        |
| <b>HRV-C7(DQ875932)</b>  | 0.812        | 0.762        | 0.759        | 0.686        | 0.754        | 0.739        | 0.792        | 0.792        | 0.739        | 0.711        | 0.683        | 0.759        |
| <b>HRV-C8(GQ223227)</b>  | 0.736        | 0.767        | 0.764        | 0.708        | 0.759        | 0.734        | 0.751        | 0.751        | 0.734        | 0.736        | 0.706        | 0.686        |
| <b>HRV-C9(GQ223228)</b>  | 0.739        | 0.718        | 0.716        | 0.736        | 0.741        | 0.762        | 0.756        | 0.756        | 0.762        | 0.739        | 0.734        | 0.673        |
| <b>HRV-C10(GQ323774)</b> | 0.764        | 0.746        | 0.749        | 0.691        | 0.726        | 0.751        | 0.85         | 0.85         | 0.751        | 0.698        | 0.691        | 0.746        |
| <b>HRV-C11(EU840952)</b> | 0.718        | 0.675        | 0.673        | 0.835        | 0.736        | 0.706        | 0.686        | 0.686        | 0.706        | 0.711        | 0.83         | 0.645        |
| <b>HRV-C12(EF077264)</b> | 0.774        | 0.762        | 0.759        | 0.683        | 0.746        | 0.711        | 0.724        | 0.724        | 0.711        | 0.734        | 0.678        | 0.67         |
| <b>HRV-C13(EU081795)</b> | 0.782        | 0.729        | 0.731        | 0.668        | 0.718        | 0.744        | 0.794        | 0.794        | 0.744        | 0.729        | 0.668        | 0.734        |
| <b>HRV-C14(EU081796)</b> | 0.741        | 0.784        | 0.782        | 0.741        | 0.777        | 0.784        | 0.731        | 0.731        | 0.784        | 0.777        | 0.739        | 0.683        |
| <b>HRV-C15(GU219984)</b> | 0.724        | 0.805        | 0.802        | 0.726        | 0.797        | 0.772        | 0.736        | 0.736        | 0.772        | 0.759        | 0.729        | 0.655        |
| <b>HRV-C16(EU081808)</b> | 0.782        | 0.764        | 0.767        | 0.683        | 0.762        | 0.731        | 0.744        | 0.744        | 0.731        | 0.751        | 0.683        | 0.678        |
| <b>HRV-C17(EU081809)</b> | 0.756        | 0.746        | 0.749        | 0.708        | 0.759        | 0.734        | 0.762        | 0.762        | 0.734        | 0.739        | 0.703        | 0.65         |
| <b>HRV-C18(EU590074)</b> | 0.739        | 0.751        | 0.749        | 0.706        | 0.774        | 0.731        | 0.734        | 0.734        | 0.731        | 0.751        | 0.703        | 0.703        |
| <b>HRV-C19(EU697850)</b> | 0.721        | 0.769        | 0.767        | 0.716        | 0.789        | 0.754        | 0.718        | 0.718        | 0.754        | 0.751        | 0.718        | 0.691        |
| <b>HRV-C20(EU697851)</b> | 0.683        | 0.696        | 0.698        | 0.807        | 0.731        | 0.739        | 0.729        | 0.729        | 0.739        | 0.736        | 0.807        | 0.65         |
| <b>HRV-C21(EU752377)</b> | 0.81         | 0.736        | 0.739        | 0.711        | 0.749        | 0.739        | 0.784        | 0.784        | 0.739        | 0.713        | 0.713        | 0.769        |
| <b>HRV-C22(EU752381)</b> | 0.764        | 0.744        | 0.741        | 0.718        | 0.731        | 0.754        | 0.805        | 0.805        | 0.754        | 0.711        | 0.721        | 0.749        |
| <b>HRV-C23(EU752424)</b> | 0.754        | 0.789        | 0.787        | 0.698        | 0.784        | 0.744        | 0.726        | 0.726        | 0.744        | 0.746        | 0.698        | 0.655        |
| <b>HRV-C24(EU752426)</b> | 0.754        | 0.764        | 0.762        | 0.729        | 0.926        | 0.782        | 0.754        | 0.754        | 0.782        | 0.769        | 0.729        | 0.653        |
| <b>HRV-C25(JF317013)</b> | 0.724        | 0.769        | 0.772        | 0.724        | 0.82         | 0.769        | 0.726        | 0.726        | 0.769        | 0.772        | 0.724        | 0.683        |

Supplemental Table 1 Sequence identity matrix between the sequences from our study and from GenBank (continue)

| Seq->             | CQ3622 | CQ3643 | CQ4193 | CQ4197 | CQ4207 | CQ4216 | CQ4226 | CQ4234 | CQ4244 | CQ4245 | CQ4257 | CQ4260 |
|-------------------|--------|--------|--------|--------|--------|--------|--------|--------|--------|--------|--------|--------|
| HRV-C26(EU752441) | 0.749  | 0.713  | 0.716  | 0.696  | 0.726  | 0.734  | 0.741  | 0.741  | 0.734  | 0.734  | 0.693  | 0.66   |
| HRV-C27(GQ223122) | 0.686  | 0.678  | 0.675  | 0.906  | 0.739  | 0.756  | 0.693  | 0.693  | 0.756  | 0.734  | 0.906  | 0.668  |
| HRV-C28(GQ223134) | 0.741  | 0.777  | 0.774  | 0.716  | 0.777  | 0.749  | 0.744  | 0.744  | 0.749  | 0.729  | 0.718  | 0.721  |
| HRV-C29(FJ615699) | 0.681  | 0.686  | 0.688  | 0.82   | 0.721  | 0.736  | 0.693  | 0.693  | 0.736  | 0.726  | 0.815  | 0.643  |
| HRV-C30(GQ476669) | 0.749  | 0.86   | 0.858  | 0.698  | 0.787  | 0.751  | 0.736  | 0.736  | 0.751  | 0.746  | 0.696  | 0.691  |
| HRV-C31(GU294380) | 0.741  | 0.746  | 0.744  | 0.696  | 0.762  | 0.739  | 0.751  | 0.751  | 0.739  | 0.729  | 0.698  | 0.698  |
| HRV-C32(GU294466) | 0.939  | 0.759  | 0.756  | 0.726  | 0.764  | 0.767  | 0.759  | 0.759  | 0.767  | 0.718  | 0.721  | 0.756  |
| HRV-C33(GU294480) | 0.696  | 0.711  | 0.713  | 0.706  | 0.746  | 0.749  | 0.698  | 0.698  | 0.749  | 0.751  | 0.703  | 0.64   |
| HRV-C34(JF519759) | 0.686  | 0.693  | 0.691  | 0.8    | 0.716  | 0.708  | 0.716  | 0.716  | 0.708  | 0.726  | 0.794  | 0.632  |
| HRV-C35(JF436925) | 0.729  | 0.739  | 0.741  | 0.734  | 0.762  | 0.787  | 0.708  | 0.708  | 0.787  | 0.835  | 0.731  | 0.698  |
| HRV-C36(EF077256) | 0.711  | 0.726  | 0.729  | 0.711  | 0.756  | 0.789  | 0.741  | 0.741  | 0.789  | 0.741  | 0.713  | 0.686  |
| HRV-C37(EF077260) | 0.731  | 0.731  | 0.729  | 0.716  | 0.724  | 0.751  | 0.741  | 0.741  | 0.751  | 0.762  | 0.713  | 0.683  |
| HRV-C38(GU294477) | 0.716  | 0.675  | 0.678  | 0.85   | 0.736  | 0.734  | 0.701  | 0.701  | 0.734  | 0.731  | 0.845  | 0.653  |
| HRV-C39(JN205461) | 0.896  | 0.746  | 0.744  | 0.716  | 0.759  | 0.754  | 0.767  | 0.767  | 0.754  | 0.718  | 0.711  | 0.739  |
| HRV-C40(EU081802) | 0.736  | 0.756  | 0.754  | 0.774  | 0.777  | 0.944  | 0.746  | 0.746  | 0.944  | 0.787  | 0.772  | 0.681  |
| HRV-C41(EU081803) | 0.756  | 0.936  | 0.934  | 0.696  | 0.787  | 0.759  | 0.721  | 0.721  | 0.759  | 0.731  | 0.696  | 0.688  |
| HRV-C42(EU081805) | 0.767  | 0.759  | 0.756  | 0.701  | 0.767  | 0.756  | 0.769  | 0.769  | 0.756  | 0.736  | 0.698  | 0.665  |
| HRV-C43(EU081807) | 0.8    | 0.734  | 0.731  | 0.711  | 0.729  | 0.754  | 0.792  | 0.792  | 0.754  | 0.716  | 0.716  | 0.845  |
| HRV-C44(EU590061) | 0.764  | 0.767  | 0.764  | 0.746  | 0.777  | 0.782  | 0.772  | 0.772  | 0.782  | 0.746  | 0.741  | 0.658  |
| HRV-C45(EU590064) | 0.673  | 0.678  | 0.681  | 0.835  | 0.729  | 0.751  | 0.701  | 0.701  | 0.751  | 0.729  | 0.835  | 0.637  |
| HRV-C46(FJ869950) | 0.726  | 0.751  | 0.749  | 0.756  | 0.759  | 0.774  | 0.734  | 0.734  | 0.774  | 0.749  | 0.759  | 0.668  |
| HRV-C47(JF519761) | 0.721  | 0.762  | 0.764  | 0.739  | 0.8    | 0.827  | 0.721  | 0.721  | 0.827  | 0.789  | 0.734  | 0.675  |
| HRV-C48(JF519763) | 0.736  | 0.759  | 0.762  | 0.724  | 0.756  | 0.8    | 0.739  | 0.739  | 0.8    | 0.787  | 0.721  | 0.678  |
| HRV-C49(JF946737) | 0.751  | 0.767  | 0.769  | 0.736  | 0.764  | 0.789  | 0.741  | 0.741  | 0.789  | 0.756  | 0.734  | 0.688  |
| HRV-C50(FJ841957) | 0.744  | 0.756  | 0.759  | 0.744  | 0.782  | 0.769  | 0.739  | 0.739  | 0.769  | 0.764  | 0.739  | 0.681  |
| HRV-C51(JF317015) | 0.731  | 0.746  | 0.749  | 0.729  | 0.759  | 0.756  | 0.741  | 0.741  | 0.756  | 0.772  | 0.724  | 0.688  |

Supplemental Table 1 Sequence identity matrix between the sequences from our study and from GenBank (continue)

| Seq->             | CQ4271       | CQ4284       | CQ4287       | CQ4290       | CQ4565       | CQ4567       | CQ4580       | CQ4599       | CQ4847       | CQ4886       | CQ4936       | CQ5101       |
|-------------------|--------------|--------------|--------------|--------------|--------------|--------------|--------------|--------------|--------------|--------------|--------------|--------------|
| <b>MaxValue</b>   | <b>0.962</b> | <b>0.901</b> | <b>0.936</b> | <b>0.777</b> | <b>0.931</b> | <b>0.911</b> | <b>0.931</b> | <b>0.964</b> | <b>0.951</b> | <b>0.972</b> | <b>0.944</b> | <b>0.911</b> |
| HRV-C1(EF077279)  | 0.767        | 0.718        | 0.739        | 0.734        | 0.731        | 0.731        | 0.731        | 0.964        | 0.756        | 0.741        | 0.739        | 0.731        |
| HRV-C2(EF077280)  | 0.779        | 0.713        | 0.726        | 0.777        | 0.777        | 0.911        | 0.777        | 0.729        | 0.772        | 0.751        | 0.855        | 0.911        |
| HRV-C3(EF186077)  | 0.769        | 0.762        | 0.782        | 0.721        | 0.739        | 0.739        | 0.739        | 0.843        | 0.759        | 0.731        | 0.751        | 0.739        |
| HRV-C4(EF582385)  | 0.739        | 0.731        | 0.749        | 0.736        | 0.751        | 0.754        | 0.751        | 0.734        | 0.731        | 0.789        | 0.767        | 0.754        |
| HRV-C5(EF582386)  | 0.724        | 0.683        | 0.698        | 0.696        | 0.744        | 0.744        | 0.744        | 0.708        | 0.716        | 0.734        | 0.731        | 0.744        |
| HRV-C6(EF582387)  | 0.762        | 0.731        | 0.749        | 0.711        | 0.721        | 0.716        | 0.721        | 0.84         | 0.751        | 0.721        | 0.754        | 0.716        |
| HRV-C7(DQ875932)  | 0.724        | 0.734        | 0.749        | 0.721        | 0.751        | 0.769        | 0.751        | 0.802        | 0.716        | 0.726        | 0.739        | 0.769        |
| HRV-C8(GQ223227)  | 0.812        | 0.777        | 0.797        | 0.731        | 0.759        | 0.762        | 0.759        | 0.734        | 0.802        | 0.739        | 0.734        | 0.762        |
| HRV-C9(GQ223228)  | 0.777        | 0.731        | 0.751        | 0.772        | 0.746        | 0.726        | 0.746        | 0.726        | 0.769        | 0.762        | 0.762        | 0.726        |
| HRV-C10(GQ323774) | 0.759        | 0.729        | 0.749        | 0.736        | 0.718        | 0.726        | 0.718        | 0.858        | 0.749        | 0.718        | 0.751        | 0.726        |
| HRV-C11(EU840952) | 0.726        | 0.683        | 0.693        | 0.688        | 0.731        | 0.716        | 0.731        | 0.683        | 0.718        | 0.713        | 0.706        | 0.716        |
| HRV-C12(EF077264) | 0.845        | 0.762        | 0.782        | 0.739        | 0.749        | 0.741        | 0.749        | 0.749        | 0.835        | 0.729        | 0.711        | 0.741        |
| HRV-C13(EU081795) | 0.721        | 0.711        | 0.726        | 0.713        | 0.721        | 0.739        | 0.721        | 0.797        | 0.711        | 0.731        | 0.744        | 0.739        |
| HRV-C14(EU081796) | 0.777        | 0.726        | 0.734        | 0.736        | 0.774        | 0.802        | 0.774        | 0.724        | 0.769        | 0.787        | 0.784        | 0.802        |
| HRV-C15(GU219984) | 0.739        | 0.751        | 0.782        | 0.741        | 0.792        | 0.739        | 0.792        | 0.726        | 0.729        | 0.782        | 0.772        | 0.739        |
| HRV-C16(EU081808) | 0.794        | 0.774        | 0.782        | 0.716        | 0.764        | 0.746        | 0.764        | 0.769        | 0.789        | 0.756        | 0.731        | 0.746        |
| HRV-C17(EU081809) | 0.802        | 0.797        | 0.82         | 0.718        | 0.751        | 0.724        | 0.751        | 0.751        | 0.792        | 0.762        | 0.734        | 0.724        |
| HRV-C18(EU590074) | 0.774        | 0.789        | 0.81         | 0.724        | 0.779        | 0.741        | 0.779        | 0.744        | 0.764        | 0.769        | 0.731        | 0.741        |
| HRV-C19(EU697850) | 0.744        | 0.731        | 0.746        | 0.741        | 0.782        | 0.762        | 0.782        | 0.731        | 0.734        | 0.972        | 0.754        | 0.762        |
| HRV-C20(EU697851) | 0.716        | 0.696        | 0.711        | 0.718        | 0.724        | 0.718        | 0.724        | 0.703        | 0.708        | 0.726        | 0.739        | 0.718        |
| HRV-C21(EU752377) | 0.721        | 0.724        | 0.741        | 0.716        | 0.741        | 0.749        | 0.741        | 0.794        | 0.713        | 0.726        | 0.739        | 0.749        |
| HRV-C22(EU752381) | 0.759        | 0.731        | 0.749        | 0.708        | 0.724        | 0.741        | 0.724        | 0.81         | 0.751        | 0.734        | 0.754        | 0.741        |
| HRV-C23(EU752424) | 0.749        | 0.746        | 0.762        | 0.724        | 0.774        | 0.751        | 0.774        | 0.731        | 0.744        | 0.749        | 0.744        | 0.751        |
| HRV-C24(EU752426) | 0.769        | 0.759        | 0.782        | 0.734        | 0.931        | 0.784        | 0.931        | 0.724        | 0.759        | 0.784        | 0.782        | 0.784        |
| HRV-C25(JF317013) | 0.782        | 0.729        | 0.759        | 0.751        | 0.817        | 0.787        | 0.817        | 0.729        | 0.772        | 0.779        | 0.769        | 0.787        |

Supplemental Table 1 Sequence identity matrix between the sequences from our study and from GenBank (continue)

| Seq->             | CQ4271 | CQ4284 | CQ4287 | CQ4290 | CQ4565 | CQ4567 | CQ4580 | CQ4599 | CQ4847 | CQ4886 | CQ4936 | CQ5101 |
|-------------------|--------|--------|--------|--------|--------|--------|--------|--------|--------|--------|--------|--------|
| HRV-C26(EU752441) | 0.749  | 0.703  | 0.731  | 0.756  | 0.734  | 0.739  | 0.734  | 0.736  | 0.741  | 0.741  | 0.734  | 0.739  |
| HRV-C27(GQ223122) | 0.691  | 0.681  | 0.693  | 0.688  | 0.724  | 0.718  | 0.724  | 0.691  | 0.686  | 0.726  | 0.756  | 0.718  |
| HRV-C28(GQ223134) | 0.789  | 0.81   | 0.825  | 0.731  | 0.787  | 0.749  | 0.787  | 0.756  | 0.779  | 0.764  | 0.749  | 0.749  |
| HRV-C29(FJ615699) | 0.706  | 0.688  | 0.721  | 0.698  | 0.713  | 0.739  | 0.713  | 0.698  | 0.698  | 0.721  | 0.736  | 0.739  |
| HRV-C30(GQ476669) | 0.756  | 0.713  | 0.731  | 0.746  | 0.774  | 0.751  | 0.774  | 0.746  | 0.746  | 0.751  | 0.751  | 0.751  |
| HRV-C31(GU294380) | 0.779  | 0.901  | 0.936  | 0.693  | 0.767  | 0.744  | 0.767  | 0.734  | 0.769  | 0.756  | 0.739  | 0.744  |
| HRV-C32(GU294466) | 0.759  | 0.729  | 0.741  | 0.734  | 0.762  | 0.754  | 0.762  | 0.789  | 0.749  | 0.744  | 0.767  | 0.754  |
| HRV-C33(GU294480) | 0.726  | 0.686  | 0.701  | 0.718  | 0.731  | 0.739  | 0.731  | 0.701  | 0.718  | 0.716  | 0.749  | 0.739  |
| HRV-C34(JF519759) | 0.734  | 0.67   | 0.688  | 0.698  | 0.711  | 0.718  | 0.711  | 0.691  | 0.726  | 0.721  | 0.708  | 0.718  |
| HRV-C35(JF436925) | 0.751  | 0.734  | 0.754  | 0.756  | 0.769  | 0.784  | 0.769  | 0.718  | 0.744  | 0.789  | 0.787  | 0.784  |
| HRV-C36(EF077256) | 0.749  | 0.711  | 0.734  | 0.764  | 0.744  | 0.764  | 0.744  | 0.721  | 0.739  | 0.762  | 0.789  | 0.764  |
| HRV-C37(EF077260) | 0.741  | 0.703  | 0.734  | 0.746  | 0.721  | 0.751  | 0.721  | 0.718  | 0.731  | 0.767  | 0.751  | 0.751  |
| HRV-C38(GU294477) | 0.734  | 0.706  | 0.721  | 0.713  | 0.731  | 0.746  | 0.731  | 0.708  | 0.726  | 0.713  | 0.734  | 0.746  |
| HRV-C39(JN205461) | 0.759  | 0.731  | 0.744  | 0.708  | 0.751  | 0.729  | 0.751  | 0.8    | 0.749  | 0.739  | 0.754  | 0.729  |
| HRV-C40(EU081802) | 0.789  | 0.718  | 0.739  | 0.759  | 0.779  | 0.848  | 0.779  | 0.744  | 0.782  | 0.769  | 0.944  | 0.848  |
| HRV-C41(EU081803) | 0.779  | 0.744  | 0.756  | 0.734  | 0.784  | 0.749  | 0.784  | 0.739  | 0.769  | 0.784  | 0.759  | 0.749  |
| HRV-C42(EU081805) | 0.835  | 0.779  | 0.8    | 0.724  | 0.764  | 0.769  | 0.764  | 0.774  | 0.825  | 0.756  | 0.756  | 0.769  |
| HRV-C43(EU081807) | 0.746  | 0.729  | 0.734  | 0.724  | 0.731  | 0.746  | 0.731  | 0.812  | 0.736  | 0.746  | 0.754  | 0.746  |
| HRV-C44(EU590061) | 0.962  | 0.782  | 0.805  | 0.756  | 0.779  | 0.774  | 0.779  | 0.759  | 0.951  | 0.779  | 0.782  | 0.774  |
| HRV-C45(EU590064) | 0.706  | 0.686  | 0.706  | 0.706  | 0.726  | 0.751  | 0.726  | 0.696  | 0.698  | 0.724  | 0.751  | 0.751  |
| HRV-C46(FJ869950) | 0.782  | 0.746  | 0.772  | 0.759  | 0.762  | 0.759  | 0.762  | 0.734  | 0.772  | 0.784  | 0.774  | 0.759  |
| HRV-C47(JF519761) | 0.779  | 0.729  | 0.741  | 0.767  | 0.8    | 0.792  | 0.8    | 0.726  | 0.772  | 0.777  | 0.827  | 0.792  |
| HRV-C48(JF519763) | 0.769  | 0.724  | 0.739  | 0.749  | 0.767  | 0.769  | 0.767  | 0.724  | 0.762  | 0.754  | 0.8    | 0.769  |
| HRV-C49(JF946737) | 0.767  | 0.734  | 0.754  | 0.744  | 0.754  | 0.754  | 0.754  | 0.739  | 0.759  | 0.8    | 0.789  | 0.754  |
| HRV-C50(FJ841957) | 0.779  | 0.729  | 0.749  | 0.729  | 0.777  | 0.772  | 0.777  | 0.746  | 0.769  | 0.779  | 0.769  | 0.772  |
| HRV-C51(JF317015) | 0.754  | 0.724  | 0.754  | 0.759  | 0.754  | 0.749  | 0.754  | 0.736  | 0.744  | 0.744  | 0.756  | 0.749  |

Supplemental Table 1 Sequence identity matrix between the sequences from our study and from GenBank (continue)

| Seq->             | CQ5102       | CQ5131       | CQ5160       | CQ5168       | CQ5177       | CQ5199       | CQ5201       | CQ5289       | CQ5539       | CQ5596       | CQ5606       | CQ5612       | CQ5632       | CQ5641       |
|-------------------|--------------|--------------|--------------|--------------|--------------|--------------|--------------|--------------|--------------|--------------|--------------|--------------|--------------|--------------|
| <b>MaxValue</b>   | <b>0.911</b> | <b>0.969</b> | <b>0.911</b> | <b>0.974</b> | <b>0.911</b> | <b>0.987</b> | <b>0.913</b> | <b>0.977</b> | <b>0.911</b> | <b>0.962</b> | <b>0.959</b> | <b>0.908</b> | <b>0.913</b> | <b>0.888</b> |
| HRV-C1(EF077279)  | 0.731        | 0.724        | 0.731        | 0.736        | 0.731        | 0.729        | 0.812        | 0.734        | 0.731        | 0.718        | 0.959        | 0.726        | 0.731        | 0.721        |
| HRV-C2(EF077280)  | 0.911        | 0.749        | 0.911        | 0.762        | 0.911        | 0.754        | 0.736        | 0.762        | 0.911        | 0.962        | 0.739        | 0.908        | 0.913        | 0.888        |
| HRV-C3(EF186077)  | 0.739        | 0.731        | 0.739        | 0.746        | 0.739        | 0.739        | 0.774        | 0.749        | 0.736        | 0.726        | 0.853        | 0.734        | 0.736        | 0.724        |
| HRV-C4(EF582385)  | 0.754        | 0.754        | 0.754        | 0.767        | 0.754        | 0.756        | 0.729        | 0.764        | 0.754        | 0.769        | 0.734        | 0.759        | 0.751        | 0.741        |
| HRV-C5(EF582386)  | 0.744        | 0.736        | 0.744        | 0.749        | 0.744        | 0.718        | 0.686        | 0.746        | 0.739        | 0.736        | 0.693        | 0.741        | 0.741        | 0.726        |
| HRV-C6(EF582387)  | 0.716        | 0.736        | 0.716        | 0.736        | 0.716        | 0.721        | 0.789        | 0.739        | 0.713        | 0.734        | 0.845        | 0.711        | 0.713        | 0.698        |
| HRV-C7(DQ875932)  | 0.769        | 0.711        | 0.769        | 0.716        | 0.769        | 0.718        | 0.81         | 0.716        | 0.767        | 0.739        | 0.81         | 0.764        | 0.767        | 0.751        |
| HRV-C8(GQ223227)  | 0.762        | 0.746        | 0.762        | 0.751        | 0.762        | 0.756        | 0.708        | 0.749        | 0.764        | 0.759        | 0.744        | 0.759        | 0.762        | 0.741        |
| HRV-C9(GQ223228)  | 0.726        | 0.774        | 0.726        | 0.777        | 0.726        | 0.751        | 0.721        | 0.779        | 0.729        | 0.734        | 0.731        | 0.729        | 0.726        | 0.716        |
| HRV-C10(GQ323774) | 0.726        | 0.716        | 0.726        | 0.731        | 0.726        | 0.716        | 0.802        | 0.734        | 0.726        | 0.729        | 0.863        | 0.726        | 0.726        | 0.711        |
| HRV-C11(EU840952) | 0.716        | 0.721        | 0.716        | 0.729        | 0.716        | 0.708        | 0.691        | 0.731        | 0.711        | 0.708        | 0.673        | 0.713        | 0.713        | 0.706        |
| HRV-C12(EF077264) | 0.741        | 0.756        | 0.741        | 0.756        | 0.741        | 0.751        | 0.726        | 0.756        | 0.744        | 0.721        | 0.746        | 0.746        | 0.741        | 0.726        |
| HRV-C13(EU081795) | 0.739        | 0.718        | 0.739        | 0.711        | 0.739        | 0.729        | 0.792        | 0.711        | 0.736        | 0.749        | 0.802        | 0.741        | 0.736        | 0.721        |
| HRV-C14(EU081796) | 0.802        | 0.789        | 0.802        | 0.792        | 0.802        | 0.756        | 0.729        | 0.792        | 0.8          | 0.812        | 0.726        | 0.794        | 0.802        | 0.787        |
| HRV-C15(GU219984) | 0.739        | 0.736        | 0.739        | 0.751        | 0.739        | 0.987        | 0.701        | 0.751        | 0.739        | 0.759        | 0.726        | 0.739        | 0.736        | 0.718        |
| HRV-C16(EU081808) | 0.746        | 0.754        | 0.746        | 0.754        | 0.746        | 0.756        | 0.726        | 0.756        | 0.741        | 0.741        | 0.774        | 0.744        | 0.744        | 0.736        |
| HRV-C17(EU081809) | 0.724        | 0.751        | 0.724        | 0.759        | 0.724        | 0.779        | 0.701        | 0.756        | 0.724        | 0.729        | 0.756        | 0.726        | 0.721        | 0.706        |
| HRV-C18(EU590074) | 0.741        | 0.739        | 0.741        | 0.746        | 0.741        | 0.767        | 0.754        | 0.746        | 0.741        | 0.741        | 0.751        | 0.739        | 0.741        | 0.726        |
| HRV-C19(EU697850) | 0.762        | 0.764        | 0.762        | 0.782        | 0.762        | 0.779        | 0.741        | 0.779        | 0.762        | 0.764        | 0.713        | 0.759        | 0.759        | 0.736        |
| HRV-C20(EU697851) | 0.718        | 0.746        | 0.718        | 0.739        | 0.718        | 0.711        | 0.698        | 0.741        | 0.721        | 0.724        | 0.706        | 0.726        | 0.718        | 0.718        |
| HRV-C21(EU752377) | 0.749        | 0.693        | 0.749        | 0.711        | 0.749        | 0.729        | 0.815        | 0.711        | 0.746        | 0.739        | 0.802        | 0.744        | 0.746        | 0.729        |
| HRV-C22(EU752381) | 0.741        | 0.726        | 0.741        | 0.741        | 0.741        | 0.736        | 0.794        | 0.741        | 0.739        | 0.764        | 0.802        | 0.741        | 0.739        | 0.724        |
| HRV-C23(EU752424) | 0.751        | 0.754        | 0.751        | 0.769        | 0.751        | 0.8          | 0.701        | 0.769        | 0.754        | 0.754        | 0.716        | 0.762        | 0.751        | 0.746        |
| HRV-C24(EU752426) | 0.784        | 0.749        | 0.784        | 0.751        | 0.784        | 0.789        | 0.708        | 0.754        | 0.782        | 0.777        | 0.726        | 0.789        | 0.782        | 0.764        |
| HRV-C25(JF317013) | 0.787        | 0.744        | 0.787        | 0.754        | 0.787        | 0.759        | 0.724        | 0.754        | 0.784        | 0.787        | 0.739        | 0.782        | 0.787        | 0.762        |



Supplementary Table S1 Sequence identity matrix between the sequences from our study and from GenBank (continue)

| Seq->             | CQ5102 | CQ5131 | CQ5160 | CQ5168 | CQ5177 | CQ5199 | CQ5201 | CQ5289 | CQ5539 | CQ5596 | CQ5606 | CQ5612 | CQ5632 | CQ5641 |
|-------------------|--------|--------|--------|--------|--------|--------|--------|--------|--------|--------|--------|--------|--------|--------|
| HRV-C26(EU752441) | 0.739  | 0.762  | 0.739  | 0.772  | 0.739  | 0.724  | 0.713  | 0.772  | 0.736  | 0.736  | 0.739  | 0.734  | 0.739  | 0.716  |
| HRV-C27(GQ223122) | 0.718  | 0.729  | 0.718  | 0.729  | 0.718  | 0.718  | 0.713  | 0.731  | 0.718  | 0.721  | 0.673  | 0.721  | 0.716  | 0.706  |
| HRV-C28(GQ223134) | 0.749  | 0.731  | 0.749  | 0.749  | 0.749  | 0.746  | 0.769  | 0.749  | 0.749  | 0.759  | 0.756  | 0.746  | 0.749  | 0.744  |
| HRV-C29(FJ615699) | 0.739  | 0.741  | 0.739  | 0.731  | 0.739  | 0.711  | 0.691  | 0.734  | 0.741  | 0.724  | 0.698  | 0.749  | 0.739  | 0.726  |
| HRV-C30(GQ476669) | 0.751  | 0.729  | 0.751  | 0.744  | 0.751  | 0.772  | 0.741  | 0.744  | 0.749  | 0.744  | 0.741  | 0.749  | 0.751  | 0.741  |
| HRV-C31(GU294380) | 0.744  | 0.751  | 0.744  | 0.764  | 0.744  | 0.767  | 0.739  | 0.764  | 0.744  | 0.734  | 0.734  | 0.741  | 0.741  | 0.724  |
| HRV-C32(GU294466) | 0.754  | 0.734  | 0.754  | 0.736  | 0.754  | 0.726  | 0.812  | 0.739  | 0.751  | 0.751  | 0.8    | 0.751  | 0.751  | 0.739  |
| HRV-C33(GU294480) | 0.739  | 0.711  | 0.739  | 0.711  | 0.739  | 0.724  | 0.698  | 0.708  | 0.734  | 0.749  | 0.701  | 0.734  | 0.736  | 0.724  |
| HRV-C34(JF519759) | 0.718  | 0.741  | 0.718  | 0.744  | 0.718  | 0.713  | 0.683  | 0.746  | 0.721  | 0.713  | 0.693  | 0.726  | 0.718  | 0.706  |
| HRV-C35(JF436925) | 0.784  | 0.756  | 0.784  | 0.754  | 0.784  | 0.777  | 0.734  | 0.754  | 0.779  | 0.769  | 0.711  | 0.782  | 0.782  | 0.777  |
| HRV-C36(EF077256) | 0.764  | 0.797  | 0.764  | 0.805  | 0.764  | 0.741  | 0.744  | 0.805  | 0.764  | 0.784  | 0.718  | 0.762  | 0.762  | 0.751  |
| HRV-C37(EF077260) | 0.751  | 0.789  | 0.751  | 0.797  | 0.751  | 0.729  | 0.741  | 0.797  | 0.754  | 0.751  | 0.726  | 0.751  | 0.751  | 0.734  |
| HRV-C38(GU294477) | 0.746  | 0.729  | 0.746  | 0.741  | 0.746  | 0.698  | 0.698  | 0.739  | 0.746  | 0.726  | 0.698  | 0.749  | 0.744  | 0.736  |
| HRV-C39(JN205461) | 0.729  | 0.729  | 0.729  | 0.739  | 0.729  | 0.736  | 0.789  | 0.741  | 0.726  | 0.736  | 0.8    | 0.726  | 0.726  | 0.708  |
| HRV-C40(EU081802) | 0.848  | 0.756  | 0.848  | 0.767  | 0.848  | 0.782  | 0.741  | 0.769  | 0.843  | 0.86   | 0.736  | 0.843  | 0.845  | 0.832  |
| HRV-C41(EU081803) | 0.749  | 0.749  | 0.749  | 0.751  | 0.749  | 0.789  | 0.741  | 0.751  | 0.746  | 0.749  | 0.739  | 0.744  | 0.749  | 0.731  |
| HRV-C42(EU081805) | 0.769  | 0.751  | 0.769  | 0.756  | 0.769  | 0.779  | 0.724  | 0.759  | 0.769  | 0.746  | 0.777  | 0.772  | 0.767  | 0.746  |
| HRV-C43(EU081807) | 0.746  | 0.718  | 0.746  | 0.729  | 0.746  | 0.698  | 0.913  | 0.729  | 0.746  | 0.754  | 0.822  | 0.741  | 0.746  | 0.729  |
| HRV-C44(EU590061) | 0.774  | 0.782  | 0.774  | 0.787  | 0.774  | 0.754  | 0.713  | 0.789  | 0.777  | 0.762  | 0.762  | 0.774  | 0.774  | 0.744  |
| HRV-C45(EU590064) | 0.751  | 0.721  | 0.751  | 0.729  | 0.751  | 0.691  | 0.686  | 0.731  | 0.751  | 0.739  | 0.696  | 0.759  | 0.749  | 0.739  |
| HRV-C46(FJ869950) | 0.759  | 0.969  | 0.759  | 0.974  | 0.759  | 0.759  | 0.708  | 0.977  | 0.762  | 0.769  | 0.729  | 0.759  | 0.759  | 0.739  |
| HRV-C47(JF519761) | 0.792  | 0.759  | 0.792  | 0.767  | 0.792  | 0.754  | 0.713  | 0.767  | 0.797  | 0.807  | 0.729  | 0.794  | 0.794  | 0.784  |
| HRV-C48(JF519763) | 0.769  | 0.767  | 0.769  | 0.759  | 0.769  | 0.749  | 0.724  | 0.762  | 0.767  | 0.782  | 0.718  | 0.762  | 0.769  | 0.767  |
| HRV-C49(JF946737) | 0.754  | 0.762  | 0.754  | 0.767  | 0.754  | 0.756  | 0.726  | 0.769  | 0.749  | 0.772  | 0.744  | 0.749  | 0.751  | 0.741  |
| HRV-C50(FJ841957) | 0.772  | 0.762  | 0.772  | 0.769  | 0.772  | 0.741  | 0.729  | 0.769  | 0.777  | 0.754  | 0.751  | 0.779  | 0.774  | 0.759  |
| HRV-C51(JF317015) | 0.749  | 0.779  | 0.749  | 0.774  | 0.749  | 0.716  | 0.744  | 0.774  | 0.754  | 0.754  | 0.749  | 0.754  | 0.751  | 0.744  |

Supplemental Table 1 Sequence identity matrix between the sequences from our study and from GenBank (continue)

| Seq->                    | CQ5653       | CQ5665       | CQ5667       | CQ5677       | CQ5678       | CQ5681       | CQ5698       | CQ5709       | CQ5710       | CQ5716       | CQ5723       | CQ5731       |
|--------------------------|--------------|--------------|--------------|--------------|--------------|--------------|--------------|--------------|--------------|--------------|--------------|--------------|
| <b>MaxValue</b>          | <b>0.908</b> | <b>0.908</b> | <b>0.956</b> | <b>0.979</b> | <b>0.967</b> | <b>0.967</b> | <b>0.908</b> | <b>0.913</b> | <b>0.913</b> | <b>0.962</b> | <b>0.962</b> | <b>0.967</b> |
| <b>HRV-C1(EF077279)</b>  | 0.729        | 0.729        | 0.721        | 0.701        | 0.967        | 0.721        | 0.729        | 0.726        | 0.731        | 0.769        | 0.962        | 0.721        |
| <b>HRV-C2(EF077280)</b>  | 0.908        | 0.908        | 0.956        | 0.741        | 0.726        | 0.967        | 0.908        | 0.913        | 0.913        | 0.734        | 0.734        | 0.967        |
| <b>HRV-C3(EF186077)</b>  | 0.739        | 0.739        | 0.724        | 0.696        | 0.848        | 0.729        | 0.739        | 0.731        | 0.736        | 0.751        | 0.845        | 0.729        |
| <b>HRV-C4(EF582385)</b>  | 0.756        | 0.756        | 0.769        | 0.746        | 0.736        | 0.764        | 0.756        | 0.746        | 0.751        | 0.749        | 0.734        | 0.764        |
| <b>HRV-C5(EF582386)</b>  | 0.736        | 0.736        | 0.736        | 0.891        | 0.696        | 0.741        | 0.736        | 0.739        | 0.741        | 0.693        | 0.703        | 0.741        |
| <b>HRV-C6(EF582387)</b>  | 0.716        | 0.716        | 0.736        | 0.696        | 0.835        | 0.729        | 0.716        | 0.708        | 0.713        | 0.741        | 0.837        | 0.729        |
| <b>HRV-C7(DQ875932)</b>  | 0.764        | 0.764        | 0.741        | 0.691        | 0.805        | 0.734        | 0.764        | 0.762        | 0.767        | 0.754        | 0.807        | 0.734        |
| <b>HRV-C8(GQ223227)</b>  | 0.762        | 0.762        | 0.759        | 0.701        | 0.731        | 0.759        | 0.762        | 0.764        | 0.762        | 0.721        | 0.736        | 0.759        |
| <b>HRV-C9(GQ223228)</b>  | 0.731        | 0.731        | 0.731        | 0.736        | 0.729        | 0.734        | 0.731        | 0.718        | 0.726        | 0.751        | 0.731        | 0.734        |
| <b>HRV-C10(GQ323774)</b> | 0.724        | 0.724        | 0.726        | 0.683        | 0.858        | 0.734        | 0.724        | 0.721        | 0.726        | 0.774        | 0.863        | 0.734        |
| <b>HRV-C11(EU840952)</b> | 0.713        | 0.713        | 0.711        | 0.893        | 0.681        | 0.708        | 0.713        | 0.716        | 0.713        | 0.693        | 0.683        | 0.708        |
| <b>HRV-C12(EF077264)</b> | 0.746        | 0.746        | 0.718        | 0.721        | 0.756        | 0.721        | 0.746        | 0.741        | 0.741        | 0.749        | 0.756        | 0.721        |
| <b>HRV-C13(EU081795)</b> | 0.734        | 0.734        | 0.751        | 0.688        | 0.805        | 0.749        | 0.734        | 0.729        | 0.736        | 0.741        | 0.802        | 0.749        |
| <b>HRV-C14(EU081796)</b> | 0.797        | 0.797        | 0.815        | 0.718        | 0.718        | 0.81         | 0.797        | 0.792        | 0.802        | 0.777        | 0.729        | 0.81         |
| <b>HRV-C15(GU219984)</b> | 0.741        | 0.741        | 0.754        | 0.713        | 0.718        | 0.751        | 0.741        | 0.734        | 0.736        | 0.777        | 0.718        | 0.751        |
| <b>HRV-C16(EU081808)</b> | 0.744        | 0.744        | 0.744        | 0.696        | 0.777        | 0.744        | 0.744        | 0.736        | 0.744        | 0.744        | 0.774        | 0.744        |
| <b>HRV-C17(EU081809)</b> | 0.726        | 0.726        | 0.726        | 0.706        | 0.749        | 0.731        | 0.726        | 0.724        | 0.721        | 0.734        | 0.751        | 0.731        |
| <b>HRV-C18(EU590074)</b> | 0.744        | 0.744        | 0.736        | 0.696        | 0.744        | 0.739        | 0.744        | 0.736        | 0.741        | 0.759        | 0.749        | 0.739        |
| <b>HRV-C19(EU697850)</b> | 0.759        | 0.759        | 0.759        | 0.718        | 0.713        | 0.762        | 0.759        | 0.751        | 0.759        | 0.751        | 0.718        | 0.762        |
| <b>HRV-C20(EU697851)</b> | 0.718        | 0.718        | 0.724        | 0.784        | 0.701        | 0.726        | 0.718        | 0.718        | 0.718        | 0.701        | 0.706        | 0.726        |
| <b>HRV-C21(EU752377)</b> | 0.749        | 0.749        | 0.736        | 0.691        | 0.792        | 0.739        | 0.749        | 0.741        | 0.746        | 0.746        | 0.794        | 0.739        |
| <b>HRV-C22(EU752381)</b> | 0.741        | 0.741        | 0.759        | 0.716        | 0.805        | 0.759        | 0.741        | 0.734        | 0.739        | 0.739        | 0.802        | 0.759        |
| <b>HRV-C23(EU752424)</b> | 0.751        | 0.751        | 0.756        | 0.716        | 0.729        | 0.754        | 0.751        | 0.746        | 0.751        | 0.789        | 0.726        | 0.754        |
| <b>HRV-C24(EU752426)</b> | 0.779        | 0.779        | 0.774        | 0.744        | 0.724        | 0.767        | 0.779        | 0.772        | 0.782        | 0.792        | 0.726        | 0.767        |
| <b>HRV-C25(JF317013)</b> | 0.787        | 0.787        | 0.784        | 0.708        | 0.741        | 0.789        | 0.787        | 0.782        | 0.787        | 0.794        | 0.741        | 0.789        |

Supplemental Table 1 Sequence identity matrix between the sequences from our study and from GenBank (continue)

| Seq->             | CQ5653 | CQ5665 | CQ5667 | CQ5677 | CQ5678 | CQ5681 | CQ5698 | CQ5709 | CQ5710 | CQ5716 | CQ5723 | CQ5731 |
|-------------------|--------|--------|--------|--------|--------|--------|--------|--------|--------|--------|--------|--------|
| HRV-C26(EU752441) | 0.734  | 0.734  | 0.734  | 0.696  | 0.741  | 0.739  | 0.734  | 0.736  | 0.739  | 0.741  | 0.741  | 0.739  |
| HRV-C27(GQ223122) | 0.721  | 0.721  | 0.724  | 0.865  | 0.673  | 0.724  | 0.721  | 0.718  | 0.716  | 0.701  | 0.681  | 0.724  |
| HRV-C28(GQ223134) | 0.751  | 0.751  | 0.756  | 0.718  | 0.749  | 0.754  | 0.751  | 0.744  | 0.749  | 0.749  | 0.749  | 0.754  |
| HRV-C29(FJ615699) | 0.739  | 0.739  | 0.718  | 0.802  | 0.701  | 0.734  | 0.739  | 0.731  | 0.739  | 0.696  | 0.706  | 0.734  |
| HRV-C30(GQ476669) | 0.746  | 0.746  | 0.746  | 0.688  | 0.744  | 0.736  | 0.746  | 0.749  | 0.751  | 0.962  | 0.746  | 0.736  |
| HRV-C31(GU294380) | 0.746  | 0.746  | 0.729  | 0.698  | 0.731  | 0.729  | 0.746  | 0.736  | 0.741  | 0.731  | 0.734  | 0.729  |
| HRV-C32(GU294466) | 0.754  | 0.754  | 0.754  | 0.724  | 0.792  | 0.741  | 0.754  | 0.746  | 0.751  | 0.749  | 0.794  | 0.741  |
| HRV-C33(GU294480) | 0.731  | 0.731  | 0.751  | 0.724  | 0.703  | 0.754  | 0.731  | 0.729  | 0.736  | 0.724  | 0.706  | 0.754  |
| HRV-C34(JF519759) | 0.718  | 0.718  | 0.708  | 0.797  | 0.693  | 0.716  | 0.718  | 0.713  | 0.718  | 0.691  | 0.693  | 0.716  |
| HRV-C35(JF436925) | 0.782  | 0.782  | 0.769  | 0.741  | 0.703  | 0.769  | 0.782  | 0.777  | 0.782  | 0.739  | 0.711  | 0.769  |
| HRV-C36(EF077256) | 0.767  | 0.767  | 0.782  | 0.721  | 0.713  | 0.784  | 0.767  | 0.762  | 0.762  | 0.731  | 0.716  | 0.784  |
| HRV-C37(EF077260) | 0.751  | 0.751  | 0.754  | 0.716  | 0.718  | 0.749  | 0.751  | 0.749  | 0.751  | 0.734  | 0.724  | 0.749  |
| HRV-C38(GU294477) | 0.749  | 0.749  | 0.729  | 0.979  | 0.701  | 0.736  | 0.749  | 0.736  | 0.744  | 0.678  | 0.703  | 0.736  |
| HRV-C39(JN205461) | 0.729  | 0.729  | 0.739  | 0.721  | 0.797  | 0.736  | 0.729  | 0.721  | 0.726  | 0.734  | 0.8    | 0.736  |
| HRV-C40(EU081802) | 0.845  | 0.845  | 0.858  | 0.751  | 0.734  | 0.858  | 0.845  | 0.845  | 0.845  | 0.756  | 0.736  | 0.858  |
| HRV-C41(EU081803) | 0.749  | 0.749  | 0.751  | 0.696  | 0.736  | 0.749  | 0.749  | 0.746  | 0.749  | 0.858  | 0.739  | 0.749  |
| HRV-C42(EU081805) | 0.767  | 0.767  | 0.746  | 0.698  | 0.777  | 0.744  | 0.767  | 0.762  | 0.767  | 0.759  | 0.769  | 0.744  |
| HRV-C43(EU081807) | 0.744  | 0.744  | 0.756  | 0.683  | 0.817  | 0.749  | 0.744  | 0.741  | 0.746  | 0.741  | 0.812  | 0.749  |
| HRV-C44(EU590061) | 0.779  | 0.779  | 0.759  | 0.734  | 0.754  | 0.764  | 0.779  | 0.769  | 0.774  | 0.746  | 0.759  | 0.764  |
| HRV-C45(EU590064) | 0.754  | 0.754  | 0.734  | 0.817  | 0.701  | 0.744  | 0.754  | 0.744  | 0.749  | 0.688  | 0.698  | 0.744  |
| HRV-C46(FJ869950) | 0.759  | 0.759  | 0.769  | 0.721  | 0.724  | 0.764  | 0.759  | 0.756  | 0.759  | 0.729  | 0.734  | 0.764  |
| HRV-C47(JF519761) | 0.8    | 0.8    | 0.807  | 0.767  | 0.721  | 0.817  | 0.8    | 0.789  | 0.794  | 0.744  | 0.729  | 0.817  |
| HRV-C48(JF519763) | 0.764  | 0.764  | 0.784  | 0.749  | 0.721  | 0.794  | 0.764  | 0.764  | 0.769  | 0.762  | 0.726  | 0.794  |
| HRV-C49(JF946737) | 0.751  | 0.751  | 0.772  | 0.724  | 0.736  | 0.772  | 0.751  | 0.746  | 0.751  | 0.774  | 0.744  | 0.772  |
| HRV-C50(FJ841957) | 0.779  | 0.779  | 0.756  | 0.736  | 0.751  | 0.762  | 0.779  | 0.769  | 0.774  | 0.741  | 0.754  | 0.762  |
| HRV-C51(JF317015) | 0.751  | 0.751  | 0.756  | 0.698  | 0.736  | 0.759  | 0.751  | 0.749  | 0.751  | 0.749  | 0.744  | 0.759  |

Supplemental Table 1 Sequence identity matrix between the sequences from our study and from GenBank (continue)

| Seq->             | CQ5736       | CQ5738       | CQ5760       | CQ5777       | CQ5778       | CQ5781       | CQ5794       | CQ5808       | CQ5812       | CQ5813       | CQ5814       | CQ5829       | CQ5835       | CQ5837       |
|-------------------|--------------|--------------|--------------|--------------|--------------|--------------|--------------|--------------|--------------|--------------|--------------|--------------|--------------|--------------|
| <b>MaxValue</b>   | <b>0.913</b> | <b>0.916</b> | <b>0.974</b> | <b>0.949</b> | <b>0.949</b> | <b>0.913</b> | <b>0.913</b> | <b>0.944</b> | <b>0.969</b> | <b>0.921</b> | <b>0.967</b> | <b>0.913</b> | <b>0.911</b> | <b>0.949</b> |
| HRV-C1(EF077279)  | 0.721        | 0.729        | 0.759        | 0.772        | 0.772        | 0.731        | 0.789        | 0.774        | 0.762        | 0.746        | 0.751        | 0.779        | 0.731        | 0.726        |
| HRV-C2(EF077280)  | 0.913        | 0.916        | 0.739        | 0.739        | 0.739        | 0.913        | 0.734        | 0.741        | 0.744        | 0.769        | 0.744        | 0.729        | 0.911        | 0.759        |
| HRV-C3(EF186077)  | 0.731        | 0.734        | 0.769        | 0.759        | 0.759        | 0.736        | 0.789        | 0.756        | 0.767        | 0.769        | 0.749        | 0.784        | 0.739        | 0.749        |
| HRV-C4(EF582385)  | 0.754        | 0.749        | 0.744        | 0.746        | 0.746        | 0.751        | 0.731        | 0.739        | 0.744        | 0.739        | 0.746        | 0.729        | 0.754        | 0.767        |
| HRV-C5(EF582386)  | 0.741        | 0.741        | 0.681        | 0.693        | 0.693        | 0.741        | 0.706        | 0.701        | 0.681        | 0.716        | 0.683        | 0.701        | 0.744        | 0.729        |
| HRV-C6(EF582387)  | 0.713        | 0.711        | 0.751        | 0.759        | 0.759        | 0.713        | 0.784        | 0.751        | 0.749        | 0.739        | 0.726        | 0.779        | 0.716        | 0.721        |
| HRV-C7(DQ875932)  | 0.759        | 0.764        | 0.721        | 0.716        | 0.716        | 0.767        | 0.8          | 0.716        | 0.724        | 0.731        | 0.739        | 0.794        | 0.769        | 0.744        |
| HRV-C8(GQ223227)  | 0.759        | 0.767        | 0.807        | 0.807        | 0.807        | 0.762        | 0.713        | 0.8          | 0.807        | 0.921        | 0.703        | 0.713        | 0.762        | 0.751        |
| HRV-C9(GQ223228)  | 0.718        | 0.721        | 0.741        | 0.749        | 0.749        | 0.726        | 0.729        | 0.741        | 0.736        | 0.769        | 0.741        | 0.724        | 0.726        | 0.739        |
| HRV-C10(GQ323774) | 0.718        | 0.724        | 0.739        | 0.744        | 0.744        | 0.726        | 0.789        | 0.741        | 0.741        | 0.734        | 0.734        | 0.789        | 0.726        | 0.726        |
| HRV-C11(EU840952) | 0.718        | 0.718        | 0.691        | 0.67         | 0.67         | 0.713        | 0.713        | 0.675        | 0.691        | 0.693        | 0.703        | 0.708        | 0.716        | 0.701        |
| HRV-C12(EF077264) | 0.739        | 0.741        | 0.764        | 0.782        | 0.782        | 0.741        | 0.726        | 0.779        | 0.764        | 0.782        | 0.762        | 0.721        | 0.741        | 0.744        |
| HRV-C13(EU081795) | 0.734        | 0.731        | 0.741        | 0.739        | 0.739        | 0.736        | 0.789        | 0.739        | 0.736        | 0.726        | 0.749        | 0.787        | 0.739        | 0.741        |
| HRV-C14(EU081796) | 0.792        | 0.794        | 0.741        | 0.759        | 0.759        | 0.802        | 0.739        | 0.756        | 0.741        | 0.746        | 0.779        | 0.739        | 0.802        | 0.759        |
| HRV-C15(GU219984) | 0.734        | 0.736        | 0.779        | 0.777        | 0.777        | 0.736        | 0.698        | 0.774        | 0.777        | 0.767        | 0.716        | 0.696        | 0.739        | 0.949        |
| HRV-C16(EU081808) | 0.736        | 0.739        | 0.881        | 0.883        | 0.883        | 0.744        | 0.718        | 0.886        | 0.881        | 0.784        | 0.741        | 0.711        | 0.746        | 0.756        |
| HRV-C17(EU081809) | 0.718        | 0.721        | 0.974        | 0.949        | 0.949        | 0.721        | 0.701        | 0.944        | 0.969        | 0.815        | 0.741        | 0.698        | 0.724        | 0.789        |
| HRV-C18(EU590074) | 0.741        | 0.739        | 0.787        | 0.805        | 0.805        | 0.741        | 0.756        | 0.802        | 0.787        | 0.797        | 0.718        | 0.746        | 0.741        | 0.774        |
| HRV-C19(EU697850) | 0.749        | 0.754        | 0.756        | 0.741        | 0.741        | 0.759        | 0.734        | 0.741        | 0.756        | 0.729        | 0.731        | 0.731        | 0.762        | 0.772        |
| HRV-C20(EU697851) | 0.721        | 0.721        | 0.703        | 0.691        | 0.691        | 0.718        | 0.688        | 0.683        | 0.703        | 0.726        | 0.708        | 0.693        | 0.718        | 0.726        |
| HRV-C21(EU752377) | 0.749        | 0.744        | 0.718        | 0.729        | 0.729        | 0.746        | 0.825        | 0.726        | 0.721        | 0.721        | 0.716        | 0.82         | 0.749        | 0.739        |
| HRV-C22(EU752381) | 0.739        | 0.736        | 0.739        | 0.734        | 0.734        | 0.739        | 0.797        | 0.726        | 0.741        | 0.726        | 0.734        | 0.794        | 0.741        | 0.734        |
| HRV-C23(EU752424) | 0.741        | 0.749        | 0.764        | 0.764        | 0.764        | 0.751        | 0.708        | 0.762        | 0.767        | 0.769        | 0.716        | 0.701        | 0.751        | 0.805        |
| HRV-C24(EU752426) | 0.782        | 0.774        | 0.767        | 0.779        | 0.779        | 0.782        | 0.713        | 0.772        | 0.772        | 0.772        | 0.731        | 0.708        | 0.784        | 0.8          |
| HRV-C25(JF317013) | 0.787        | 0.784        | 0.744        | 0.754        | 0.754        | 0.787        | 0.721        | 0.751        | 0.749        | 0.779        | 0.741        | 0.721        | 0.787        | 0.787        |

Supplemental Table 1 Sequence identity matrix between the sequences from our study and from GenBank (continue)

| Seq->             | CQ5736 | CQ5738 | CQ5760 | CQ5777 | CQ5778 | CQ5781 | CQ5794 | CQ5808 | CQ5812 | CQ5813 | CQ5814 | CQ5829 | CQ5835 | CQ5837 |
|-------------------|--------|--------|--------|--------|--------|--------|--------|--------|--------|--------|--------|--------|--------|--------|
| HRV-C26(EU752441) | 0.731  | 0.734  | 0.736  | 0.744  | 0.744  | 0.739  | 0.721  | 0.741  | 0.731  | 0.718  | 0.967  | 0.713  | 0.739  | 0.731  |
| HRV-C27(GQ223122) | 0.724  | 0.721  | 0.701  | 0.693  | 0.693  | 0.716  | 0.726  | 0.696  | 0.706  | 0.696  | 0.688  | 0.721  | 0.718  | 0.721  |
| HRV-C28(GQ223134) | 0.749  | 0.746  | 0.802  | 0.797  | 0.797  | 0.749  | 0.756  | 0.792  | 0.802  | 0.805  | 0.708  | 0.751  | 0.749  | 0.764  |
| HRV-C29(FJ615699) | 0.734  | 0.734  | 0.693  | 0.711  | 0.711  | 0.739  | 0.691  | 0.708  | 0.693  | 0.693  | 0.736  | 0.691  | 0.739  | 0.716  |
| HRV-C30(GQ476669) | 0.749  | 0.751  | 0.726  | 0.751  | 0.751  | 0.751  | 0.739  | 0.754  | 0.724  | 0.754  | 0.741  | 0.731  | 0.751  | 0.777  |
| HRV-C31(GU294380) | 0.736  | 0.736  | 0.787  | 0.779  | 0.779  | 0.741  | 0.741  | 0.772  | 0.789  | 0.807  | 0.721  | 0.736  | 0.744  | 0.756  |
| HRV-C32(GU294466) | 0.744  | 0.749  | 0.756  | 0.751  | 0.751  | 0.751  | 0.805  | 0.754  | 0.759  | 0.744  | 0.744  | 0.797  | 0.754  | 0.731  |
| HRV-C33(GU294480) | 0.734  | 0.731  | 0.726  | 0.741  | 0.741  | 0.736  | 0.691  | 0.739  | 0.731  | 0.718  | 0.721  | 0.686  | 0.739  | 0.718  |
| HRV-C34(JF519759) | 0.716  | 0.716  | 0.718  | 0.716  | 0.716  | 0.718  | 0.683  | 0.708  | 0.718  | 0.716  | 0.713  | 0.683  | 0.718  | 0.711  |
| HRV-C35(JF436925) | 0.779  | 0.779  | 0.751  | 0.744  | 0.744  | 0.782  | 0.724  | 0.744  | 0.746  | 0.739  | 0.756  | 0.724  | 0.784  | 0.767  |
| HRV-C36(EF077256) | 0.756  | 0.759  | 0.736  | 0.724  | 0.724  | 0.762  | 0.716  | 0.721  | 0.736  | 0.721  | 0.802  | 0.721  | 0.764  | 0.751  |
| HRV-C37(EF077260) | 0.749  | 0.746  | 0.716  | 0.724  | 0.724  | 0.751  | 0.739  | 0.726  | 0.716  | 0.731  | 0.832  | 0.736  | 0.751  | 0.736  |
| HRV-C38(GU294477) | 0.744  | 0.739  | 0.708  | 0.706  | 0.706  | 0.744  | 0.708  | 0.708  | 0.708  | 0.713  | 0.711  | 0.708  | 0.746  | 0.718  |
| HRV-C39(JN205461) | 0.724  | 0.724  | 0.759  | 0.749  | 0.749  | 0.726  | 0.782  | 0.751  | 0.762  | 0.724  | 0.739  | 0.784  | 0.729  | 0.736  |
| HRV-C40(EU081802) | 0.85   | 0.848  | 0.741  | 0.744  | 0.744  | 0.845  | 0.739  | 0.746  | 0.741  | 0.756  | 0.731  | 0.734  | 0.848  | 0.784  |
| HRV-C41(EU081803) | 0.751  | 0.749  | 0.769  | 0.764  | 0.764  | 0.749  | 0.729  | 0.767  | 0.767  | 0.764  | 0.726  | 0.726  | 0.749  | 0.794  |
| HRV-C42(EU081805) | 0.754  | 0.762  | 0.812  | 0.802  | 0.802  | 0.767  | 0.731  | 0.794  | 0.815  | 0.794  | 0.711  | 0.731  | 0.769  | 0.772  |
| HRV-C43(EU081807) | 0.744  | 0.744  | 0.701  | 0.716  | 0.716  | 0.746  | 0.913  | 0.716  | 0.703  | 0.739  | 0.729  | 0.913  | 0.746  | 0.696  |
| HRV-C44(EU590061) | 0.769  | 0.769  | 0.812  | 0.812  | 0.812  | 0.774  | 0.718  | 0.805  | 0.812  | 0.802  | 0.744  | 0.713  | 0.774  | 0.749  |
| HRV-C45(EU590064) | 0.746  | 0.746  | 0.686  | 0.681  | 0.681  | 0.749  | 0.703  | 0.686  | 0.686  | 0.693  | 0.703  | 0.698  | 0.751  | 0.696  |
| HRV-C46(FJ869950) | 0.754  | 0.754  | 0.749  | 0.751  | 0.751  | 0.759  | 0.726  | 0.749  | 0.754  | 0.764  | 0.764  | 0.724  | 0.759  | 0.754  |
| HRV-C47(JF519761) | 0.8    | 0.792  | 0.746  | 0.749  | 0.749  | 0.794  | 0.718  | 0.754  | 0.751  | 0.746  | 0.751  | 0.713  | 0.792  | 0.784  |
| HRV-C48(JF519763) | 0.769  | 0.767  | 0.746  | 0.746  | 0.746  | 0.769  | 0.724  | 0.749  | 0.751  | 0.764  | 0.772  | 0.718  | 0.769  | 0.767  |
| HRV-C49(JF946737) | 0.754  | 0.749  | 0.756  | 0.769  | 0.769  | 0.751  | 0.741  | 0.767  | 0.762  | 0.754  | 0.746  | 0.744  | 0.754  | 0.762  |
| HRV-C50(FJ841957) | 0.774  | 0.772  | 0.764  | 0.769  | 0.769  | 0.774  | 0.721  | 0.767  | 0.764  | 0.751  | 0.749  | 0.713  | 0.772  | 0.751  |
| HRV-C51(JF317015) | 0.746  | 0.746  | 0.739  | 0.734  | 0.734  | 0.751  | 0.734  | 0.736  | 0.744  | 0.739  | 0.802  | 0.734  | 0.749  | 0.736  |

Supplemental Table 1 Sequence identity matrix between the sequences from our study and from GenBank (continue)

| Seq->             | CQ5840       | CQ5844       | CQ5871       | CQ5874       | CQ5878       | CQ5920       | CQ5974       | CQ5999       | CQ3100       | CQ3323       | CQ5146       | CQ6014       | CQ6039       |
|-------------------|--------------|--------------|--------------|--------------|--------------|--------------|--------------|--------------|--------------|--------------|--------------|--------------|--------------|
| <b>MaxValue</b>   | <b>0.962</b> | <b>0.969</b> | <b>0.962</b> | <b>0.951</b> | <b>0.908</b> | <b>0.979</b> | <b>0.987</b> | <b>0.911</b> | <b>0.969</b> | <b>0.977</b> | <b>0.972</b> | <b>0.951</b> | <b>0.969</b> |
| HRV-C1(EF077279)  | 0.708        | 0.855        | 0.962        | 0.812        | 0.693        | 0.739        | 0.734        | 0.787        | 0.855        | 0.787        | 0.741        | 0.769        | 0.729        |
| HRV-C2(EF077280)  | 0.746        | 0.736        | 0.729        | 0.762        | 0.726        | 0.762        | 0.749        | 0.731        | 0.736        | 0.744        | 0.751        | 0.741        | 0.764        |
| HRV-C3(EF186077)  | 0.706        | 0.863        | 0.848        | 0.82         | 0.703        | 0.736        | 0.736        | 0.787        | 0.863        | 0.764        | 0.731        | 0.774        | 0.726        |
| HRV-C4(EF582385)  | 0.754        | 0.706        | 0.734        | 0.731        | 0.756        | 0.746        | 0.744        | 0.729        | 0.706        | 0.759        | 0.789        | 0.767        | 0.746        |
| HRV-C5(EF582386)  | 0.81         | 0.706        | 0.701        | 0.718        | 0.837        | 0.703        | 0.708        | 0.698        | 0.706        | 0.681        | 0.734        | 0.698        | 0.711        |
| HRV-C6(EF582387)  | 0.703        | 0.848        | 0.837        | 0.802        | 0.686        | 0.741        | 0.736        | 0.787        | 0.848        | 0.782        | 0.721        | 0.754        | 0.729        |
| HRV-C7(DQ875932)  | 0.698        | 0.782        | 0.815        | 0.792        | 0.698        | 0.744        | 0.741        | 0.797        | 0.782        | 0.792        | 0.726        | 0.744        | 0.731        |
| HRV-C8(GQ223227)  | 0.696        | 0.734        | 0.736        | 0.726        | 0.681        | 0.721        | 0.724        | 0.711        | 0.734        | 0.726        | 0.739        | 0.772        | 0.731        |
| HRV-C9(GQ223228)  | 0.739        | 0.734        | 0.726        | 0.741        | 0.731        | 0.764        | 0.762        | 0.726        | 0.734        | 0.741        | 0.762        | 0.774        | 0.749        |
| HRV-C10(GQ323774) | 0.698        | 0.969        | 0.868        | 0.805        | 0.693        | 0.764        | 0.754        | 0.792        | 0.969        | 0.762        | 0.718        | 0.744        | 0.754        |
| HRV-C11(EU840952) | 0.805        | 0.698        | 0.681        | 0.701        | 0.835        | 0.706        | 0.708        | 0.711        | 0.698        | 0.711        | 0.713        | 0.675        | 0.708        |
| HRV-C12(EF077264) | 0.696        | 0.759        | 0.754        | 0.734        | 0.688        | 0.759        | 0.749        | 0.724        | 0.759        | 0.756        | 0.729        | 0.815        | 0.739        |
| HRV-C13(EU081795) | 0.711        | 0.777        | 0.805        | 0.802        | 0.691        | 0.746        | 0.741        | 0.787        | 0.777        | 0.779        | 0.731        | 0.739        | 0.734        |
| HRV-C14(EU081796) | 0.729        | 0.724        | 0.729        | 0.764        | 0.708        | 0.756        | 0.756        | 0.741        | 0.724        | 0.731        | 0.787        | 0.759        | 0.762        |
| HRV-C15(GU219984) | 0.681        | 0.706        | 0.721        | 0.736        | 0.693        | 0.713        | 0.718        | 0.701        | 0.706        | 0.731        | 0.782        | 0.774        | 0.713        |
| HRV-C16(EU081808) | 0.686        | 0.744        | 0.769        | 0.746        | 0.681        | 0.718        | 0.716        | 0.711        | 0.744        | 0.764        | 0.756        | 0.782        | 0.703        |
| HRV-C17(EU081809) | 0.688        | 0.744        | 0.749        | 0.731        | 0.681        | 0.749        | 0.744        | 0.703        | 0.744        | 0.759        | 0.762        | 0.8          | 0.744        |
| HRV-C18(EU590074) | 0.716        | 0.736        | 0.744        | 0.764        | 0.703        | 0.744        | 0.751        | 0.754        | 0.736        | 0.734        | 0.769        | 0.774        | 0.751        |
| HRV-C19(EU697850) | 0.703        | 0.708        | 0.721        | 0.744        | 0.698        | 0.734        | 0.734        | 0.726        | 0.708        | 0.724        | 0.972        | 0.749        | 0.734        |
| HRV-C20(EU697851) | 0.843        | 0.708        | 0.706        | 0.701        | 0.815        | 0.754        | 0.746        | 0.691        | 0.708        | 0.686        | 0.726        | 0.731        | 0.744        |
| HRV-C21(EU752377) | 0.696        | 0.777        | 0.797        | 0.794        | 0.701        | 0.724        | 0.718        | 0.822        | 0.777        | 0.8          | 0.726        | 0.731        | 0.721        |
| HRV-C22(EU752381) | 0.724        | 0.805        | 0.807        | 0.951        | 0.713        | 0.718        | 0.721        | 0.794        | 0.805        | 0.759        | 0.734        | 0.739        | 0.713        |
| HRV-C23(EU752424) | 0.686        | 0.741        | 0.721        | 0.731        | 0.708        | 0.734        | 0.731        | 0.706        | 0.741        | 0.741        | 0.749        | 0.767        | 0.724        |
| HRV-C24(EU752426) | 0.729        | 0.726        | 0.724        | 0.726        | 0.718        | 0.736        | 0.749        | 0.711        | 0.726        | 0.762        | 0.784        | 0.754        | 0.739        |
| HRV-C25(JF317013) | 0.729        | 0.754        | 0.736        | 0.739        | 0.736        | 0.756        | 0.751        | 0.724        | 0.754        | 0.724        | 0.779        | 0.726        | 0.769        |

Supplemental Table 1 Sequence identity matrix between the sequences from our study and from GenBank (continue)

| Seq->             | CQ5840 | CQ5844 | CQ5871 | CQ5874 | CQ5878 | CQ5920 | CQ5974 | CQ5999 | CQ3100 | CQ3323 | CQ5146 | CQ6014 | CQ6039 |
|-------------------|--------|--------|--------|--------|--------|--------|--------|--------|--------|--------|--------|--------|--------|
| HRV-C26(EU752441) | 0.698  | 0.731  | 0.741  | 0.734  | 0.686  | 0.807  | 0.794  | 0.718  | 0.731  | 0.739  | 0.741  | 0.731  | 0.789  |
| HRV-C27(GQ223122) | 0.82   | 0.698  | 0.678  | 0.716  | 0.883  | 0.726  | 0.734  | 0.718  | 0.698  | 0.708  | 0.726  | 0.683  | 0.729  |
| HRV-C28(GQ223134) | 0.706  | 0.739  | 0.749  | 0.784  | 0.688  | 0.749  | 0.746  | 0.754  | 0.739  | 0.739  | 0.764  | 0.772  | 0.741  |
| HRV-C29(FJ615699) | 0.87   | 0.713  | 0.698  | 0.706  | 0.832  | 0.751  | 0.741  | 0.693  | 0.713  | 0.675  | 0.721  | 0.731  | 0.746  |
| HRV-C30(GQ476669) | 0.675  | 0.751  | 0.746  | 0.739  | 0.698  | 0.746  | 0.736  | 0.731  | 0.751  | 0.754  | 0.751  | 0.741  | 0.741  |
| HRV-C31(GU294380) | 0.703  | 0.749  | 0.734  | 0.749  | 0.683  | 0.736  | 0.741  | 0.744  | 0.749  | 0.731  | 0.756  | 0.794  | 0.729  |
| HRV-C32(GU294466) | 0.683  | 0.774  | 0.8    | 0.759  | 0.688  | 0.741  | 0.731  | 0.797  | 0.774  | 0.977  | 0.744  | 0.769  | 0.734  |
| HRV-C33(GU294480) | 0.696  | 0.693  | 0.701  | 0.718  | 0.701  | 0.731  | 0.718  | 0.683  | 0.693  | 0.698  | 0.716  | 0.716  | 0.729  |
| HRV-C34(JF519759) | 0.832  | 0.716  | 0.688  | 0.718  | 0.827  | 0.739  | 0.736  | 0.686  | 0.716  | 0.681  | 0.721  | 0.739  | 0.729  |
| HRV-C35(JF436925) | 0.713  | 0.706  | 0.713  | 0.721  | 0.724  | 0.759  | 0.756  | 0.726  | 0.706  | 0.726  | 0.789  | 0.754  | 0.756  |
| HRV-C36(EF077256) | 0.734  | 0.726  | 0.716  | 0.754  | 0.736  | 0.805  | 0.802  | 0.713  | 0.726  | 0.724  | 0.762  | 0.749  | 0.789  |
| HRV-C37(EF077260) | 0.698  | 0.729  | 0.724  | 0.729  | 0.703  | 0.85   | 0.848  | 0.741  | 0.729  | 0.741  | 0.767  | 0.726  | 0.84   |
| HRV-C38(GU294477) | 0.817  | 0.698  | 0.701  | 0.713  | 0.848  | 0.706  | 0.703  | 0.711  | 0.698  | 0.716  | 0.713  | 0.706  | 0.703  |
| HRV-C39(JN205461) | 0.691  | 0.769  | 0.805  | 0.774  | 0.693  | 0.741  | 0.746  | 0.784  | 0.769  | 0.901  | 0.739  | 0.769  | 0.744  |
| HRV-C40(EU081802) | 0.734  | 0.736  | 0.731  | 0.754  | 0.731  | 0.754  | 0.751  | 0.736  | 0.736  | 0.756  | 0.769  | 0.744  | 0.756  |
| HRV-C41(EU081803) | 0.67   | 0.739  | 0.739  | 0.749  | 0.678  | 0.736  | 0.741  | 0.726  | 0.739  | 0.759  | 0.784  | 0.736  | 0.734  |
| HRV-C42(EU081805) | 0.711  | 0.774  | 0.777  | 0.746  | 0.703  | 0.731  | 0.726  | 0.729  | 0.774  | 0.767  | 0.756  | 0.951  | 0.721  |
| HRV-C43(EU081807) | 0.696  | 0.794  | 0.822  | 0.794  | 0.693  | 0.739  | 0.739  | 0.911  | 0.794  | 0.789  | 0.746  | 0.736  | 0.739  |
| HRV-C44(EU590061) | 0.711  | 0.762  | 0.754  | 0.756  | 0.683  | 0.759  | 0.754  | 0.716  | 0.762  | 0.754  | 0.779  | 0.83   | 0.749  |
| HRV-C45(EU590064) | 0.962  | 0.703  | 0.693  | 0.724  | 0.908  | 0.729  | 0.731  | 0.696  | 0.703  | 0.675  | 0.724  | 0.706  | 0.729  |
| HRV-C46(FJ869950) | 0.713  | 0.744  | 0.731  | 0.739  | 0.736  | 0.782  | 0.792  | 0.724  | 0.744  | 0.744  | 0.784  | 0.769  | 0.777  |
| HRV-C47(JF519761) | 0.718  | 0.724  | 0.724  | 0.744  | 0.736  | 0.779  | 0.782  | 0.716  | 0.724  | 0.726  | 0.777  | 0.736  | 0.784  |
| HRV-C48(JF519763) | 0.716  | 0.713  | 0.718  | 0.731  | 0.698  | 0.756  | 0.749  | 0.726  | 0.713  | 0.734  | 0.754  | 0.767  | 0.756  |
| HRV-C49(JF946737) | 0.746  | 0.729  | 0.744  | 0.726  | 0.759  | 0.774  | 0.772  | 0.739  | 0.729  | 0.751  | 0.8    | 0.749  | 0.774  |
| HRV-C50(FJ841957) | 0.744  | 0.739  | 0.751  | 0.734  | 0.751  | 0.772  | 0.772  | 0.718  | 0.739  | 0.739  | 0.779  | 0.772  | 0.769  |
| HRV-C51(JF317015) | 0.731  | 0.756  | 0.744  | 0.724  | 0.734  | 0.979  | 0.987  | 0.736  | 0.756  | 0.726  | 0.744  | 0.724  | 0.969  |
